# Supplementary material for: Thermal fracture kinetics of heterogeneous semiflexible polymers
Source: Royal Society of Chemistry journal article supplement (doi:10.1039/c9sm01637f), 2020-01-01
Supplement: c9sm01637f2.pdf [file c9sm01637f2.pdf]

Electronic Supplementary Material (ESI) for Soft Matter.  
This journal is © The Royal Society of Chemistry 2020
